# Supplementary material for: TNFR1 Contributes to Activation-Induced Cell Death of Pathological CD4+ T Lymphocytes During Ischemic Heart Failure
Source: PubMed Central journal article supplement — JACC Basic Transl Sci. 2022 Jul 6;7(10):1038–49. doi: 10.1016/j.jacbts.2022.05.005 (PMC9626895; doi:10.1016/j.jacbts.2022.05.005), 2022-07-06
Supplement: mmc1.pdf [file mmc1.pdf]

**Supplemental Appendix**

**Supplemental Table 1:** Page 2

**Supplemental Figure S1:** page 3

**Supplemental Figure S2:** page 4

**Supplemental Figure S3:** page 5

**Supplemental Figure S4:** page 6

**Supplemental Figure S5:** page 7

**Supplemental Figure S6:** page 8

**Supplemental Figure S7:** page 9

**Supplemental Table 1.** List of antibodies used for flow cytometry

| <b><i>Antibody</i></b> | <b><i>Clone</i></b> | <b><i>Source</i></b> | <b><i>Catalog#</i></b> |
|------------------------|---------------------|----------------------|------------------------|
| Bcl-xL-PE              | 7B2.5               | Abcam                | ab26035                |
| CD45.1-FITC            | A20                 | BioLegend            | 110706                 |
| CD45.2-PE              | 104                 | BioLegend            | 109808                 |
| CD4-PECY7              | RM4-5               | BioLegend            | 100528                 |
| Foxp3-APC              | FJK-16s             | Invitrogen           | 17-5773-82             |
| TNF $\alpha$ -PE       | MP6-XT22            | Invitrogen           | 12-7321-82             |
| Ki67-APC-eF780         | SolA15              | Invitrogen           | 47-5698-82             |
| CD69-PerCP-Cy5.5       | H1.2F3              | Tonbo                | 65-0691-U100           |

Supplemental Figures

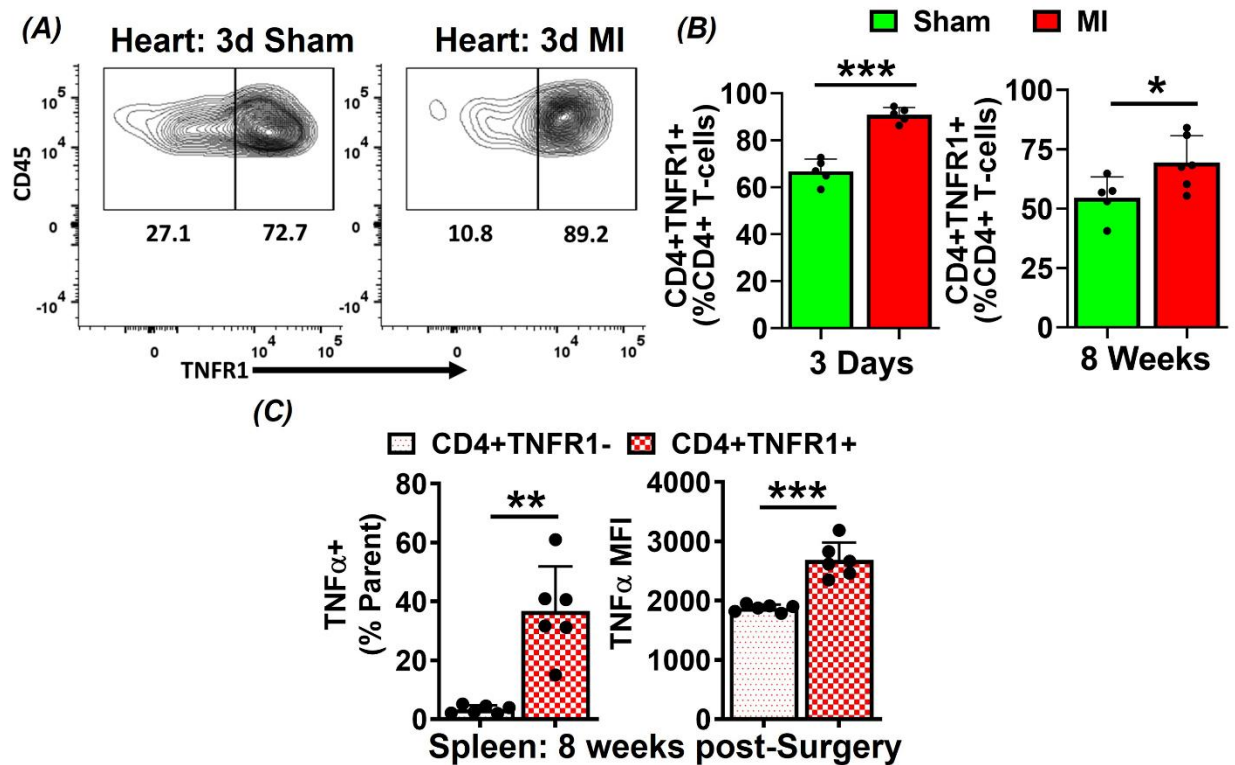

Supplemental Figure 1

**Supplemental Figure 1.** (A) Representative flow contour plots showing cardiac TNFR1<sup>+</sup>CD4<sup>+</sup> helper T-cells at 3 days post-MI or sham surgery, and (B) group quantitation for their frequency at 3 days (left) and 8 weeks (right) post-MI or sham surgery. (C) Group quantitation for frequency of TNFα<sup>+</sup> cells and its MFI in CD4<sup>+</sup>TNFR1<sup>-</sup> and CD4<sup>+</sup>TNFR1<sup>+</sup> T cells in the spleens of HF mice. Data in (B) and (C) were analyzed using unpaired Student's t-test. \*p<0.05, \*\*p<0.01 and \*\*\*p<0.001 represent significance with respect to indicated groups.

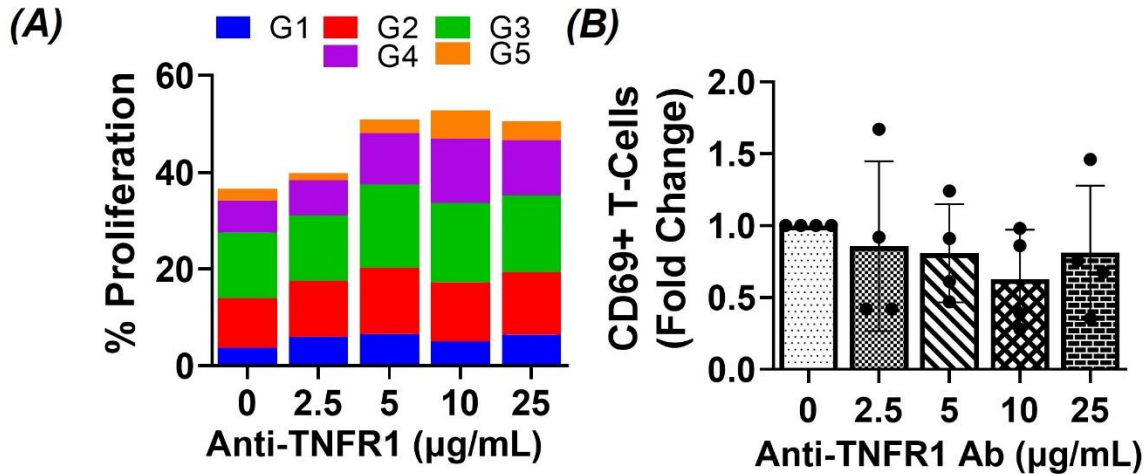

## Supplemental Figure 2

**Supplemental Figure 2.** **(A)** Quantitative data for different generations (G1-G5) that proliferated 1-5 times in the absence and presence of different concentration of anti-TNFR1 antibody. Data is shown from a representative experiment. **(B)** Fold change in the frequency (%) of CD69<sup>+</sup>CD4<sup>+</sup> T-cells in proliferated T-cells treated with different concentrations of neutralizing anti-TNFR1 antibody. All experiments were repeated 4 times with 3-4 replicates in each experiment and fold change (*right*) calculated with respect to non-treated stimulated controls for each individual experiment is shown. Data in **(B)** were analyzed using one-way ANOVA and p-values were adjusted using FDR.

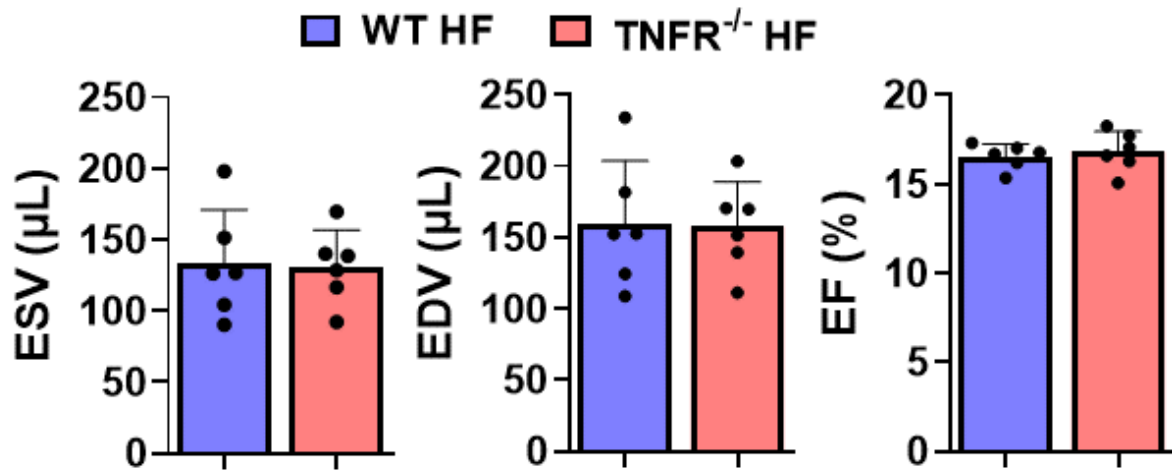

**Supplemental Figure 3.** Group quantitation for end-systolic and end-diastolic volumes (ESV and EDV), and ejection fraction (EF) of heart failure WT and TNFR1<sup>-/-</sup> donor mice at the time of cell isolation. Data were analyzed using unpaired Student's t-test.

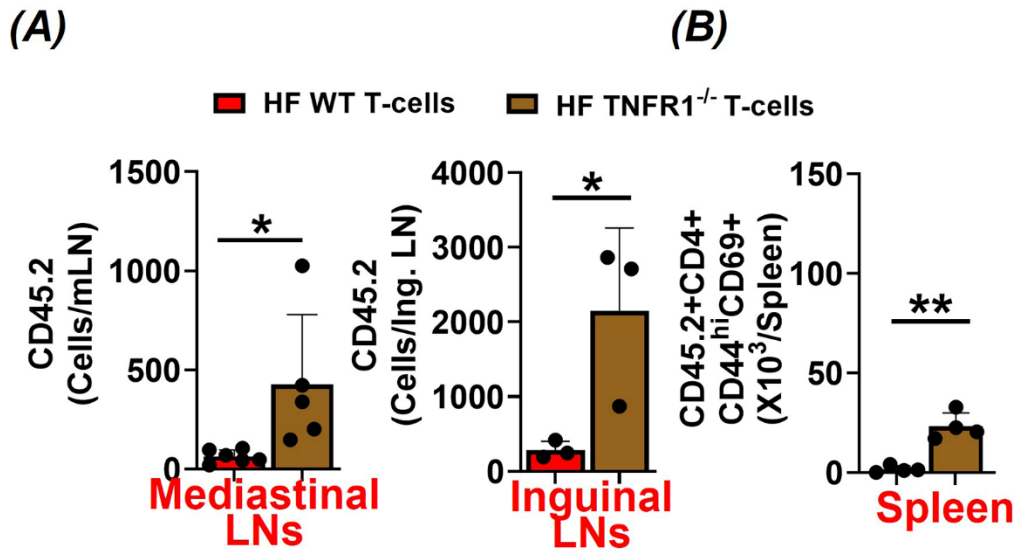

### Supplemental Figure 4

**Supplemental Figure 4.** (A) Adoptively transferred HF-activated WT or TNFR1<sup>-/-</sup> donor CD45.2<sup>+</sup>CD4<sup>+</sup> T-cells in the mediastinal (*left*) and inguinal lymph nodes (*right*) of CD45.1 recipient mice at 14 weeks post-transfer. (B) CD44<sup>hi</sup>CD69<sup>+</sup> activated T-cells among adoptively transferred CD45.2<sup>+</sup>CD4<sup>+</sup> T-cells derived from HF WT or TNFR1<sup>-/-</sup> mice in the spleens of CD45.1 recipient mice at 14 weeks post-transfer. Data in (A), and (B) were analyzed using unpaired Student's t-test. \*p<0.05, and \*\*p<0.01 represent significance with respect to indicated groups.

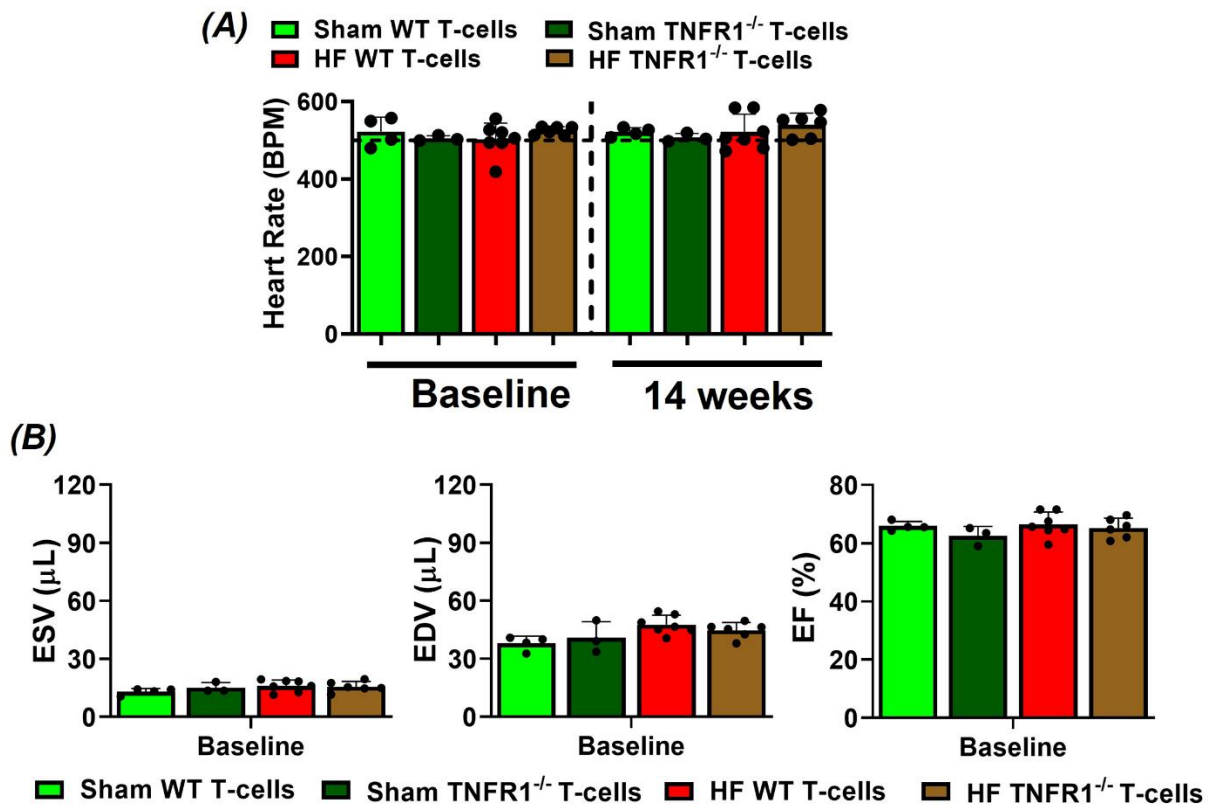

### Supplemental Figure 5

**Supplemental Figure 5.** (A) Heart rate of recipient CD45.1 mice at baseline (before injection) and at 14 weeks post-adoptive transfer of CD45.2<sup>+</sup> T-cells isolated either from the WT or TNFR1<sup>-/-</sup> sham or HF mice. (B) Group quantitation for end-systolic and end-diastolic volumes (ESV and EDV), and ejection fraction (EF) of CD45.1<sup>+</sup> recipient mice before the adoptive-transfer (at baseline) of HF-activated CD45.2<sup>+</sup>CD4<sup>+</sup> T-cells isolated either from WT or TNFR1<sup>-/-</sup> mice. Data were analyzed using two-way ANOVA and p-values were adjusted using FDR.

## Recipient Hearts: Donor Derived Cells

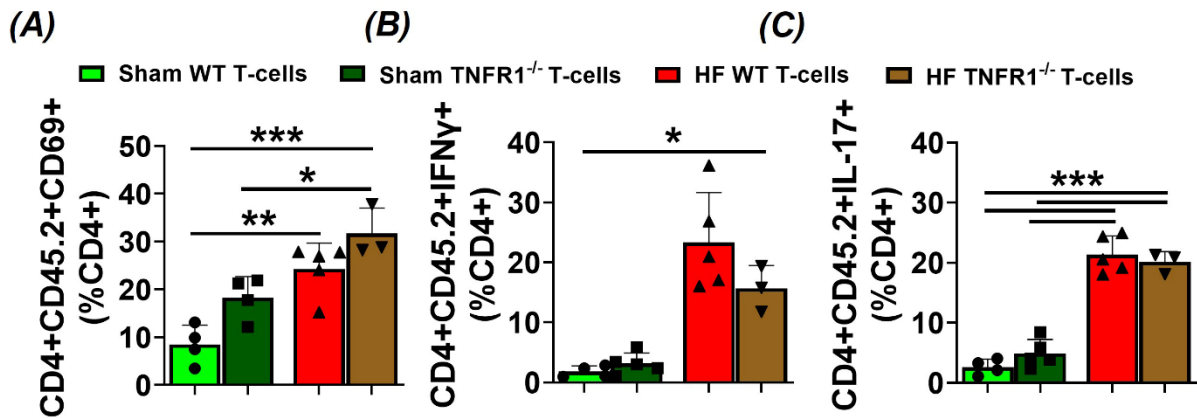

### Supplemental Figure 6

**Supplemental Figure 6.** Group quantitation for frequency (%) of **(A)** CD45.2<sup>+</sup>CD4<sup>+</sup> CD69<sup>+</sup>, **(B)** CD45.2<sup>+</sup>CD4<sup>+</sup> IFN $\gamma$ <sup>+</sup> Th1 and **(C)** CD45.2<sup>+</sup>CD4<sup>+</sup> IL-17<sup>+</sup> Th17 T-cells among total donor-derived CD45.2<sup>+</sup>CD4<sup>+</sup> T-cells in the hearts of CD45.1 recipient mice injected either with sham or HF T-cells isolated either from WT or TNFR1<sup>-/-</sup> mice. Study was repeated 2-times (n=2-5 in each study) and data from one experiment are shown. Data were analyzed using two-way ANOVA and p-values were adjusted using FDR. \*p<0.05, \*\*p<0.01 and \*\*\*p<0.001 represent significance with respect to indicated groups.



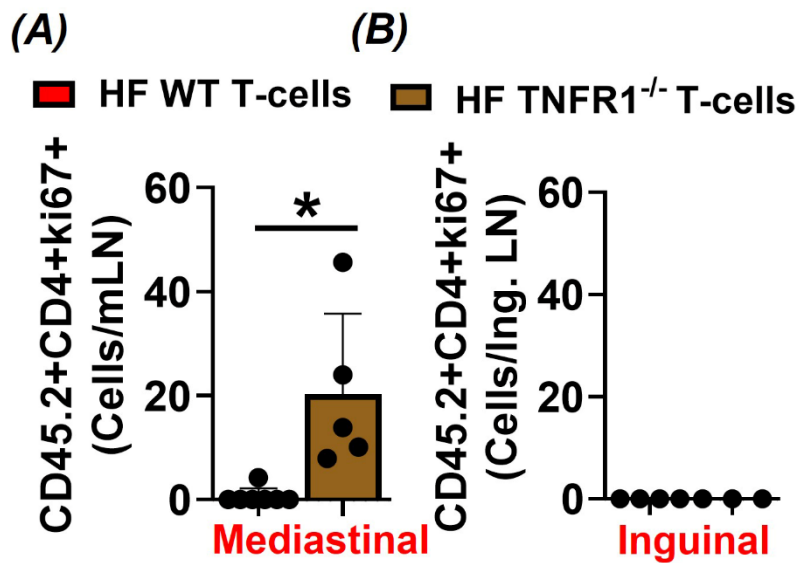

## Supplemental Figure 7

**Supplemental Figure 7.** **(A)** cell counts of donor-derived CD45.2<sup>+</sup>CD4<sup>+</sup> Ki67<sup>+</sup> T-cells in the mediastinal and **(B)** inguinal lymph-nodes of recipient CD45.1 mice injected with HF T-cells isolated either from WT or TNFR1<sup>-/-</sup> mice. Study was repeated 2-times (n=2-5 in each study) and data from one experiment are shown. Data were analyzed using unpaired Student's t-test. \*p<0.05, represent significance with respect to the indicated group.
